# Supplementary material for: Improvements in Sub-Catchment Fractional Snowpack and Snowmelt Parameterizations and Hydrologic Modeling for Climate Change Assessments in the Western Himalayas
Source: MDPI journal article supplement (doi:10.3390/hydrology8040179), 2021-12-07
Supplement: s1 [file s1]

## Figures

**Figure S1: (a) Soil and (b) Land use/Land cover maps of the Satluj river catchment, India; sub-catchment boundaries up to Kasol gauge.**

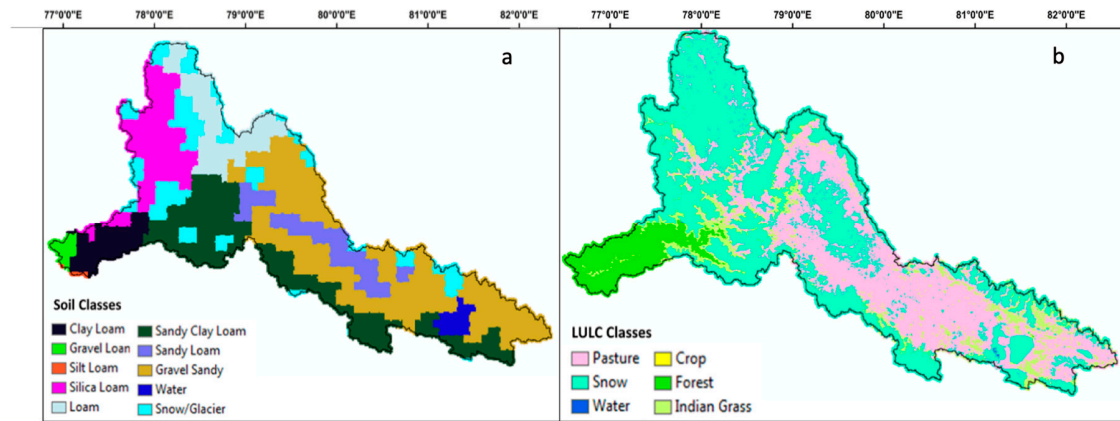

Figure S2. Changes and inter annual comparisons in average annual (a) precipitation, (b) snowpack/snowfall, (c) snowmelt, (d) water yield (due to snow) and (e) total water yield (snowmelt and rainfall runoff) over the study area in different temporal climate domains (1991-2030).

(a)

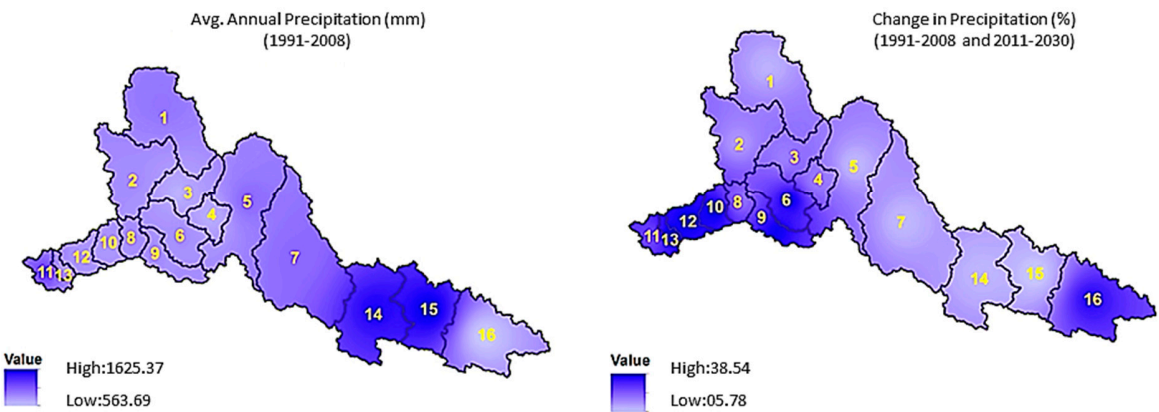

(b)

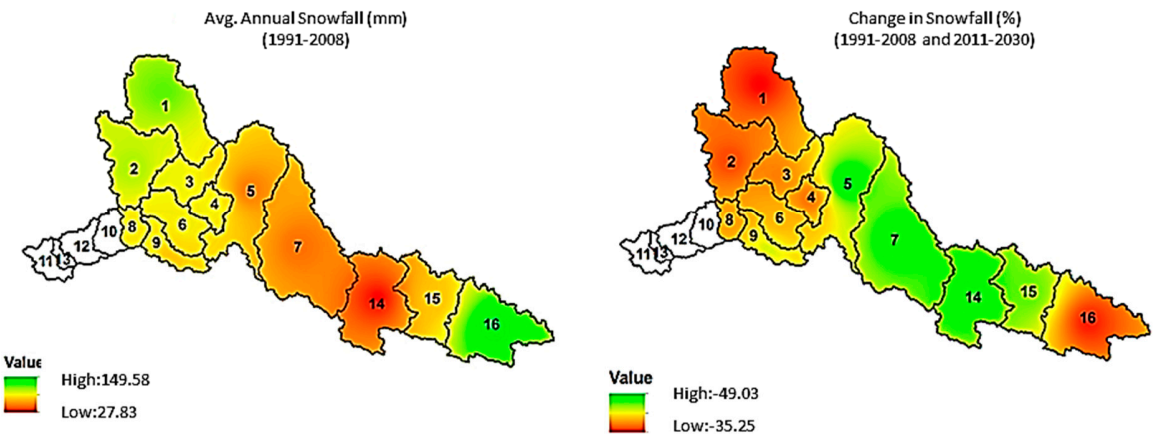

(c)

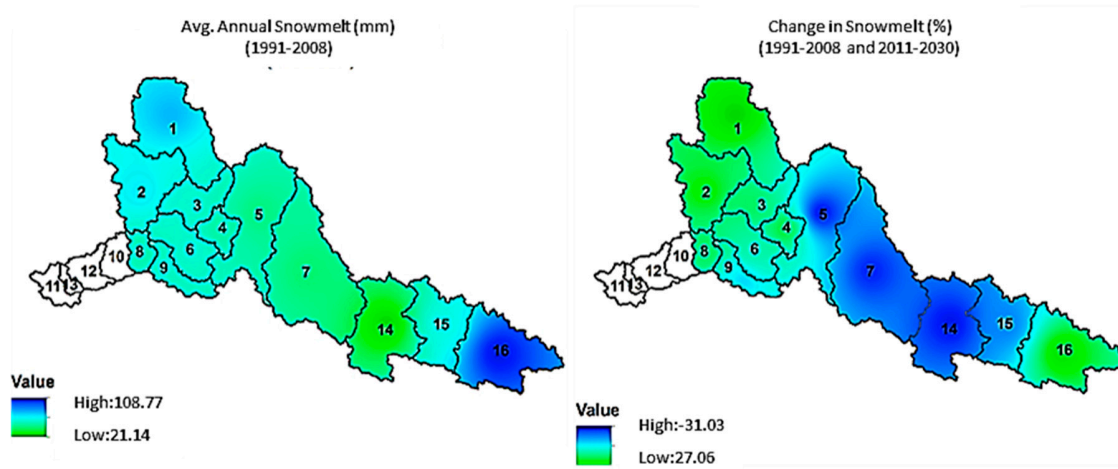

(d)

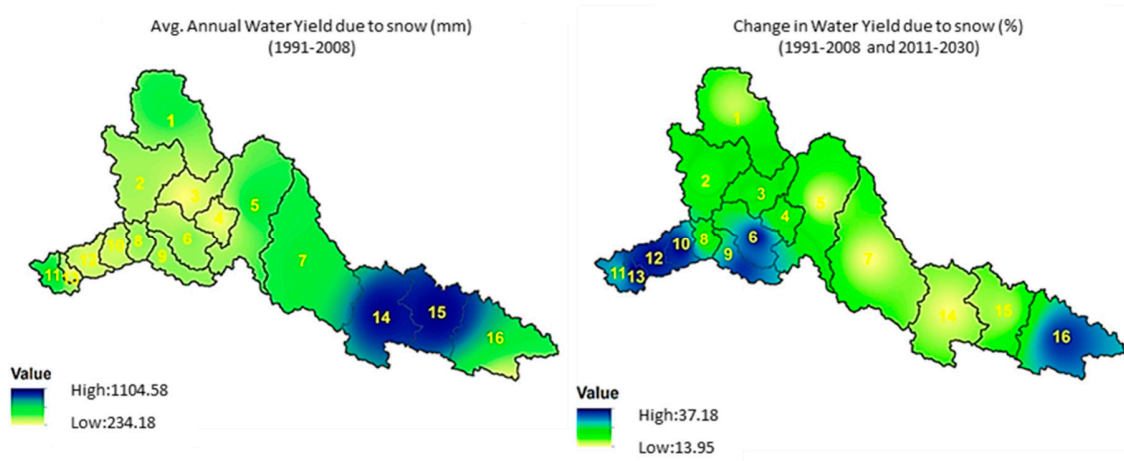

(e)

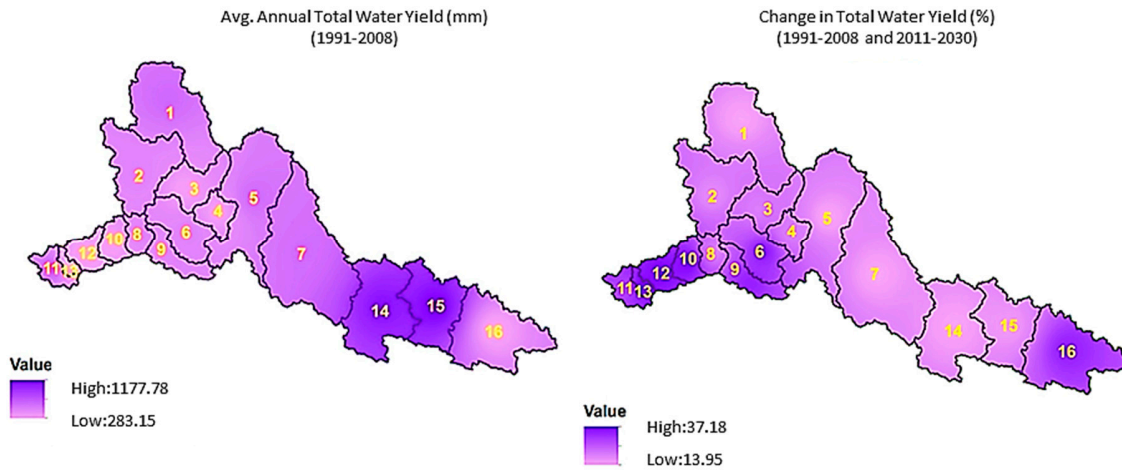

## Tables

**Table S1:** Description of model calibration parameters

| Streamflow parameters selected for calibration and validation | Description                                                          |
|---------------------------------------------------------------|----------------------------------------------------------------------|
| SNOCOVMX.bsn                                                  | Minimum snow water content                                           |
| HRU_SLP.hru                                                   | Average slope steepness                                              |
| SOL_K.sol                                                     | Soil hydraulic conductivity                                          |
| SNO50COV.bsn                                                  | Fraction of snow volume                                              |
| PLAPS.sub                                                     | Precipitation lapse rate                                             |
| SFTMP.bsn                                                     | Snowfall temperature                                                 |
| GWQMN.gw                                                      | Threshold depth of water in shallow aquifer required for return flow |
| CH_N2.rte                                                     | Manning roughness coefficient for main channel                       |
| SOL_BD.sol                                                    | Moist bulk density                                                   |
| SOL_AWC.sol                                                   | Available water capacity of the soil layer                           |
| GW_REVAP.gw                                                   | Groundwater 'revaporation' coefficient                               |
| SMTMP.bsn                                                     | Snowmelt base temperature                                            |
| ALPHA_BF.gw                                                   | Baseflow alfa factor coefficient                                     |
| SMFMN.bsn                                                     | Melt factor for snow on December 21 <sup>st</sup>                    |
| SOL_Z.sol                                                     | Depth from soil surface to bottom layer                              |
| GW_DELAY.gw                                                   | Groundwater delay time                                               |
| TLAPS.sub                                                     | Temperature lapse rate                                               |
| CH_K2.rte                                                     | Effective hydraulic conductivity                                     |
| SMFMX.bsn                                                     | Melt factor for snow on June 21 <sup>st</sup>                        |
| CN2.mgt                                                       | Curve number coefficient                                             |

**Table S2:** Aggregate parameters values, their ranges and global sensitivity results

| Daily results   |                 |              |               |               |        |         |
|-----------------|-----------------|--------------|---------------|---------------|--------|---------|
| SI. No.         | Parameter       | Fitted Value | Minimum Value | Maximum Value | t-Stat | P-Value |
| 1               | A__SNOCOVMX.bsn | 300.0        | 0.0           | 500.0         | -2.1   | 0.03    |
| 2               | R__HRU_SLP.hru  | 0.2          | 0.2           | 0.2           | -0.2   | 0.9     |
| 3               | R__SOL_K.sol    | 0.3          | 0.0           | 1.3           | -0.2   | 0.8     |
| 4               | R__SNO50COV.bsn | 0.4          | 0.0           | 50.0          | -0.2   | 0.8     |
| 5               | A__PLAPS.sub    | 277.0        | 100.0         | 300.0         | 0.3    | 0.8     |
| 6               | A__SFTMP.bsn    | -1.7         | -1.8          | 1.0           | -0.4   | 0.7     |
| 7               | V__GWQMN.gw     | 1.0          | 0.8           | 1.1           | -0.4   | 0.7     |
| 8               | V__CH_N2.rte    | 0.3          | 0.2           | 0.3           | 0.5    | 0.6     |
| 9               | R__SOL_BD.sol   | 1.4          | 1.2           | 1.5           | 0.7    | 0.5     |
| 10              | R__SOL_AWC.sol  | 0.6          | 0.6           | 0.7           | 0.7    | 0.5     |
| 11              | V__GW_REVAP.gw  | 0.12         | 0.0           | 0.5           | 0.9    | 0.4     |
| 12              | V__SMTMP.bsn    | -0.5         | -2.7          | 2.0           | -0.9   | 0.4     |
| 13              | A__ALPHA_BF.gw  | 0.12         | 0.06          | 0.19          | -1.4   | 0.2     |
| 14              | V__SMFMN.bsn    | 2.4          | 4.0           | 7.7           | -1.4   | 0.2     |
| 15              | V__SOL_Z.sol    | 2813.7       | 100.0         | 4000.0        | 1.6    | 0.1     |
| 16              | V__GW_DELAY.gw  | 10.5         | 8.0           | 50.0          | -2.1   | 0.02    |
| 17              | A__TLAPS.sub    | -4.1         | -7.0          | 2.5           | -2.2   | 0.01    |
| 18              | V__CH_K2.rte    | 27.0         | 22.1          | 75.0          | 2.4    | 0.0     |
| 19              | V__SMFMX.bsn    | 4.5          | 3.5           | 6.5           | 6.4    | 0.0     |
| 20              | R__CN2.mgt      | 0.03         | 0.0           | 0.1           | -8.6   | 0.0     |
| Monthly results |                 |              |               |               |        |         |
| 1               | R__SOL_BD.sol   | 1.0          | 0.9           | 1.6           | -0.1   | 0.9     |
| 2               | V__SMFMN.bsn    | 2.1          | 2.0           | 7.2           | 0.3    | 0.8     |

|    |                  |        |        |        |       |     |
|----|------------------|--------|--------|--------|-------|-----|
| 3  | A__PLAPS.sub     | 337.0  | 100.0  | 350.0  | -0.3  | 0.7 |
| 4  | V__GW_REVAP.gw   | 0.1    | 0.1    | 0.2    | -0.4  | 0.7 |
| 5  | V__TLAPS.sub     | -4.6   | -6.2   | 2.5    | 0.4   | 0.7 |
| 6  | V__GWQMN.gw      | 1.6    | 0.8    | 1.7    | 0.7   | 0.5 |
| 7  | R__SOL_AWC.sol   | 0.5    | 0.5    | 0.9    | -0.8  | 0.4 |
| 8  | V__SOL_Z.sol     | 1295.8 | 1264.5 | 4388.4 | -0.8  | 0.4 |
| 9  | V__ALPHA_BF.gw   | 0.11   | 0.0    | 1.7    | 0.8   | 0.4 |
| 10 | V__SNOCOV MX.bsn | 100.0  | 50.0   | 500.0  | -1.0  | 0.3 |
| 11 | V__SMTMP.bsn     | 0.7    | 0.6    | 1.7    | 1.1   | 0.3 |
| 12 | V__SFTMP.bsn     | 1.4    | 1.0    | 1.9    | 1.4   | 0.2 |
| 13 | V__SMFMX.bsn     | 4.4    | 33     | 5.5    | -1.8  | 0.1 |
| 14 | R__SOL_K.sol     | 0.5    | 0.6    | 1.3    | 2.1   | 0.0 |
| 15 | V__GW_DELAY.gw   | 20.1   | 7.0    | 250.0  | 2.6   | 0.0 |
| 16 | R__CN2.mgt       | 0.02   | 0.0    | 0.1    | -4.6  | 0.0 |
| 17 | V__SNO50COV.bsn  | 0.2    | 0.0    | 1.0    | -11.7 | 0.0 |

---
